# Supplementary material for: Reduced Symptoms of Inattention after Dietary Omega-3 Fatty Acid Supplementation in Boys with and without Attention Deficit/Hyperactivity Disorder
Source: PubMed Central journal article supplement — Neuropsychopharmacology. 2015 Apr 22;40(10):2298–306. doi: 10.1038/npp.2015.73 (PMC4538345; doi:10.1038/npp.2015.73), 2015-04-22
Supplement: npp201573x1.pdf [file npp201573x1.pdf]

**ENROLLMENT**

Assessed for eligibility N = 372

Excluded N = 290  
 Did not meet criteria (132)  
 Declined to participate (129)  
 Other reasons (29)

Invited for intake N = 82

**INCLUSION**

Inclusion

Excluded after intake N = 3  
 Declined further participation

Randomized into treatment

**ADHD**<sup>Active</sup>  
 N=20

**RG**<sup>Active</sup>  
 N=20

**ADHD**<sup>Placebo</sup>  
 N=20

**RG**<sup>Placebo</sup>  
 N=19

**DESIGN & FOLLOW-UP**

**Baseline**

- fMRI*  
Go/NoGo-task
- Physiology*  
Urine sampling  
Cheekcell sampling  
EFAQ
- Behavior*  
CBCL  
SWAN
- Compliance*  
DLCQ  
Weighing of test product

*Interim Visit 1*  
 DLCQ  
 SWAN

*Interim Visit 2*  
 DLCQ  
 SWAN

*Interim Visit 3*  
 DLCQ  
 SWAN

**16-week intervention**

Double-blind randomized placebo-controlled  
 2x2 factorial design

**Follow-up**

- fMRI*  
Go/NoGo-task
- Physiology*  
Urine sampling  
Cheekcell sampling  
EFAQ
- Behavior*  
CBCL  
SWAN
- Compliance*  
DLCQ  
Weighing of leftover product

**ADHD**<sup>Active</sup>  
 N=19

**RG**<sup>Active</sup>  
 N=20

**ADHD**<sup>Placebo</sup>  
 N=19

**RG**<sup>Placebo</sup>  
 N=18

Excluded from analysis  
 Non-compliance (1)

Lost to follow-up  
 Adverse event (1)

Lost to follow-up  
 Drop-out (1)
