# Supplementary figures and images for: Reduced Symptoms of Inattention after Dietary Omega-3 Fatty Acid Supplementation in Boys with and without Attention Deficit/Hyperactivity Disorder
Source: PubMed Central journal article supplement — Neuropsychopharmacology. 2015 Apr 22;40(10):2298–306. doi: 10.1038/npp.2015.73 (PMC4538345; doi:10.1038/npp.2015.73), 2015-04-22

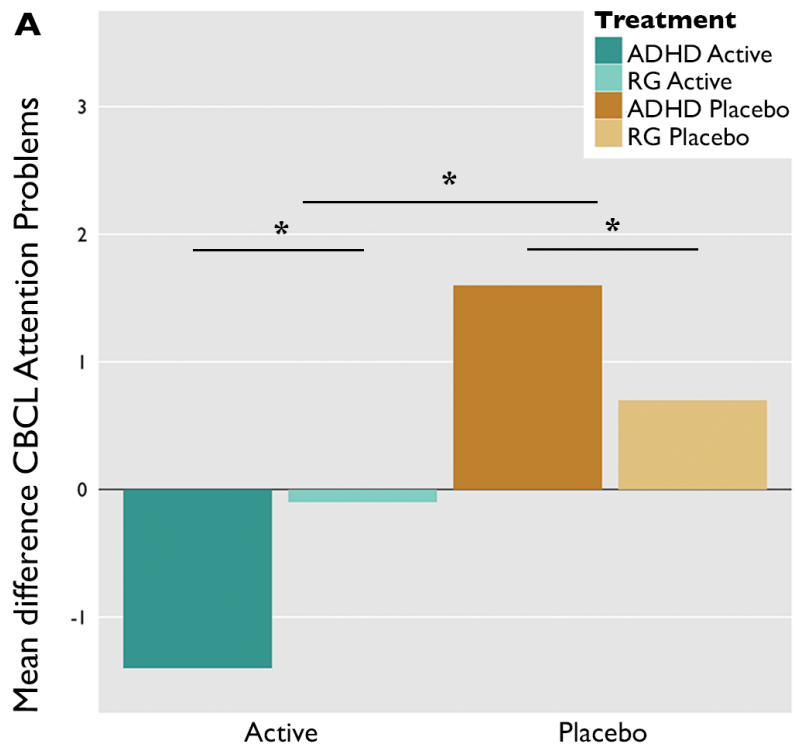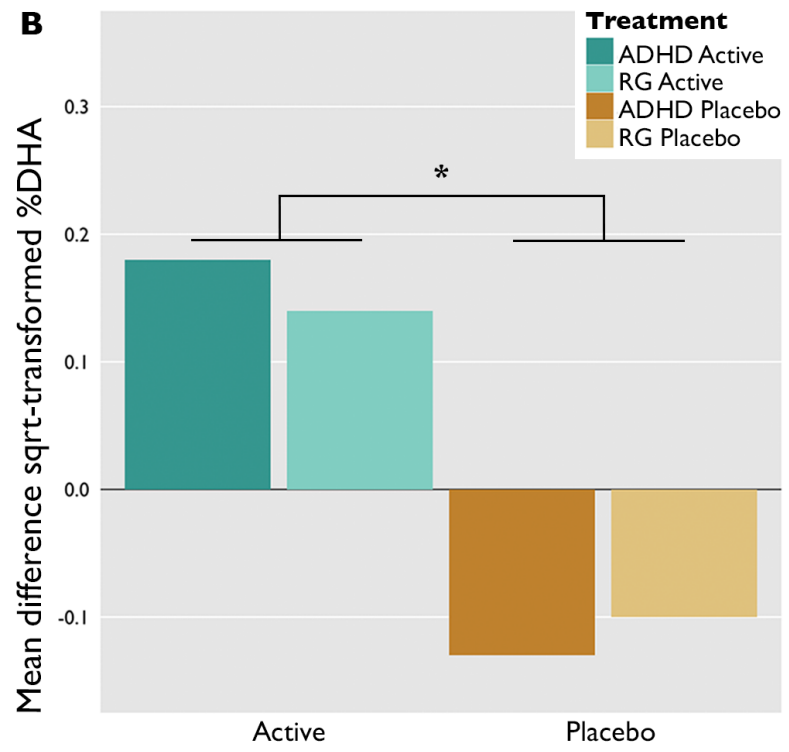

Supplement: npp201573x2.pdf [file npp201573x2.pdf]

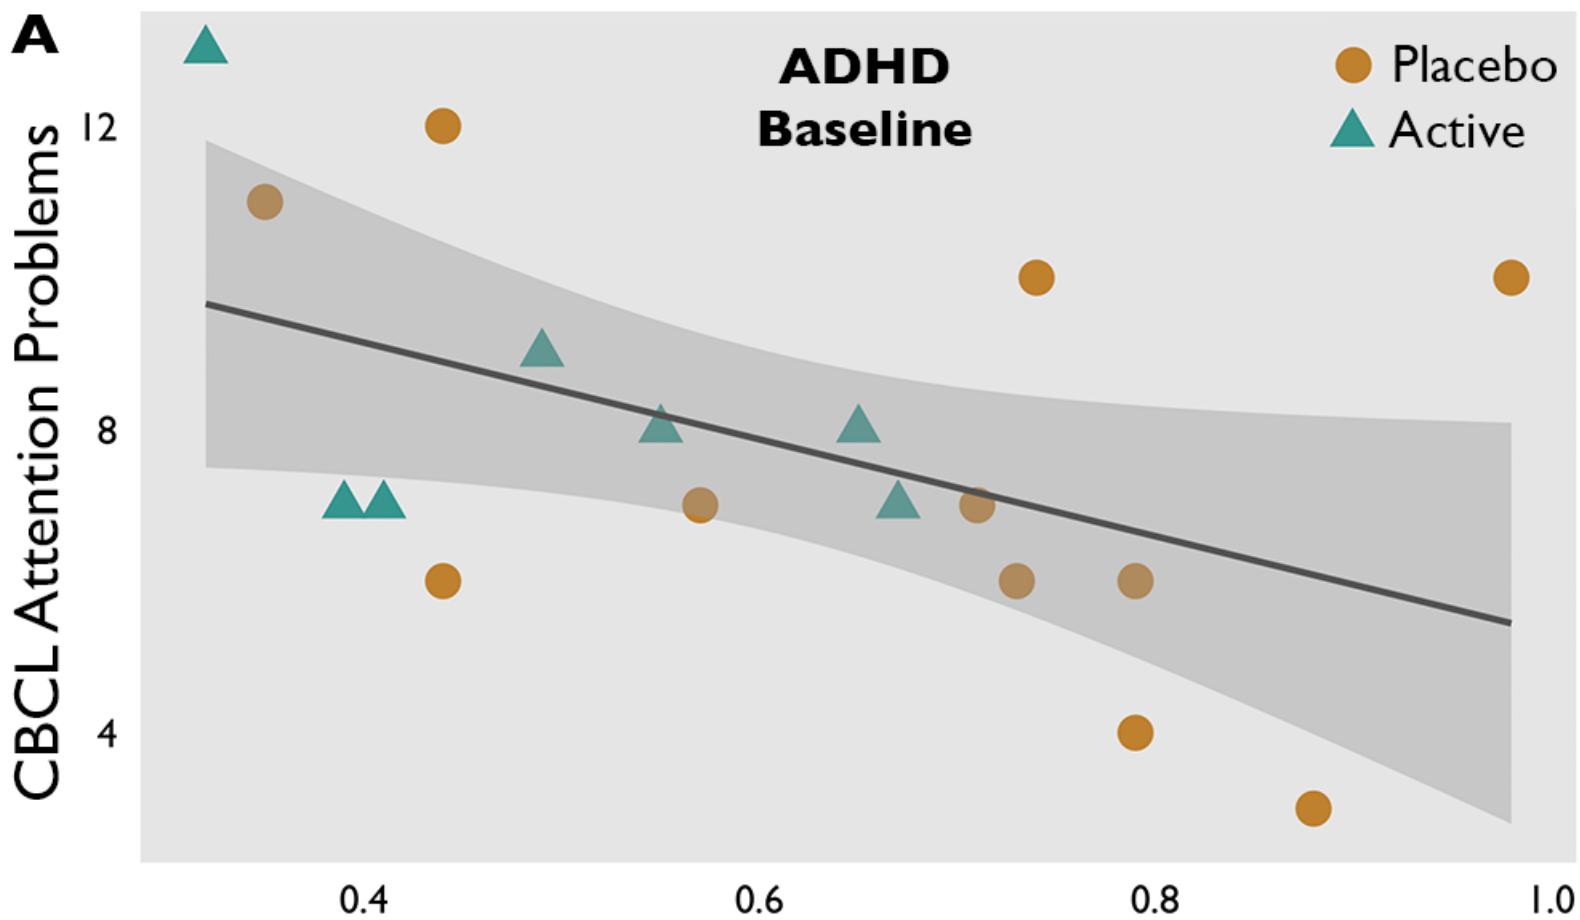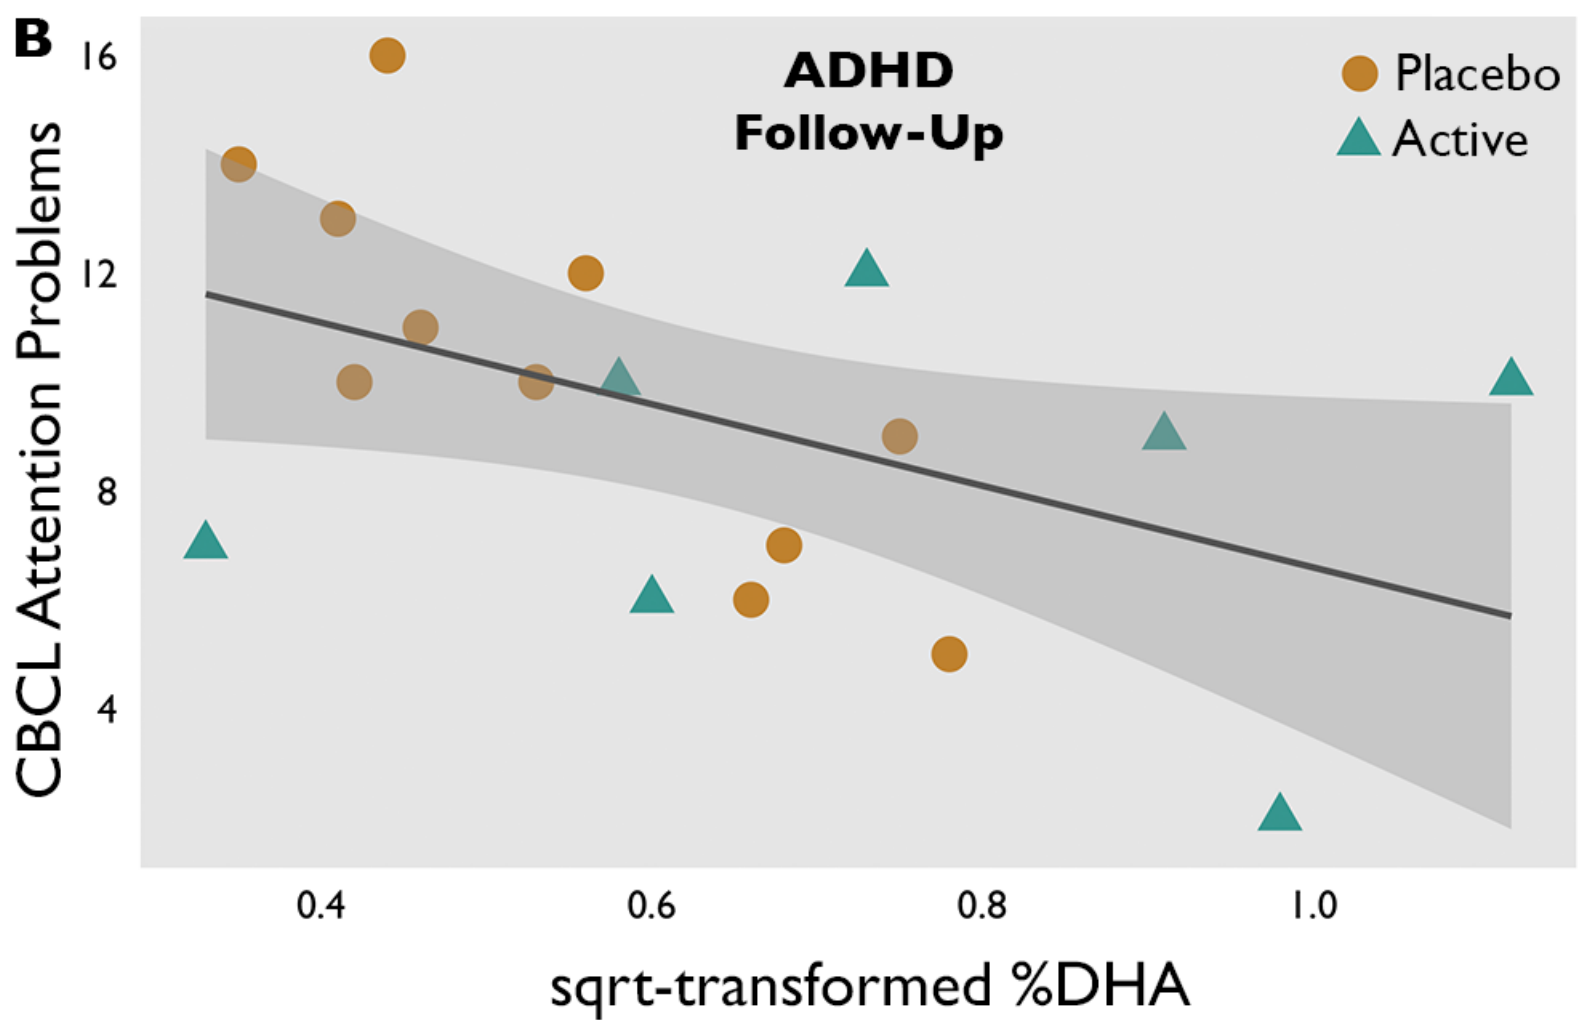

Supplement: npp201573x3.pdf [file npp201573x3.pdf]
